# Supplementary material for: Molecular design of organic sensitizers absorbing over a broadened visible region for dye-sensitized solar cells
Source: Royal Society of Chemistry journal article supplement (doi:10.1039/c4ra10896e), 2014-10-30

## **Molecular design of the organic sensitizers absorbing in broadened visible region for dye-sensitized solar cell**

Huixing Li<sup>1</sup>, Yuanzuo Li<sup>2</sup>, Maodu Chen<sup>1,\*</sup>

1. *Key Laboratory of Materials Modification by Laser, Electron, and Ion Beams (Ministry of Education), School of Physics and Optoelectronic Technology, Dalian University of Technology, Dalian 116024, P. R. China.*
2. *College of Science, Northeast Forestry University, Harbin 150040, P. R. China.*

\*Corresponding author, E-mail: [mdchen@dlut.edu.cn](mailto:mdchen@dlut.edu.cn)(M. D. Chen).

Table S1. The frontier molecular orbitals for XS54.

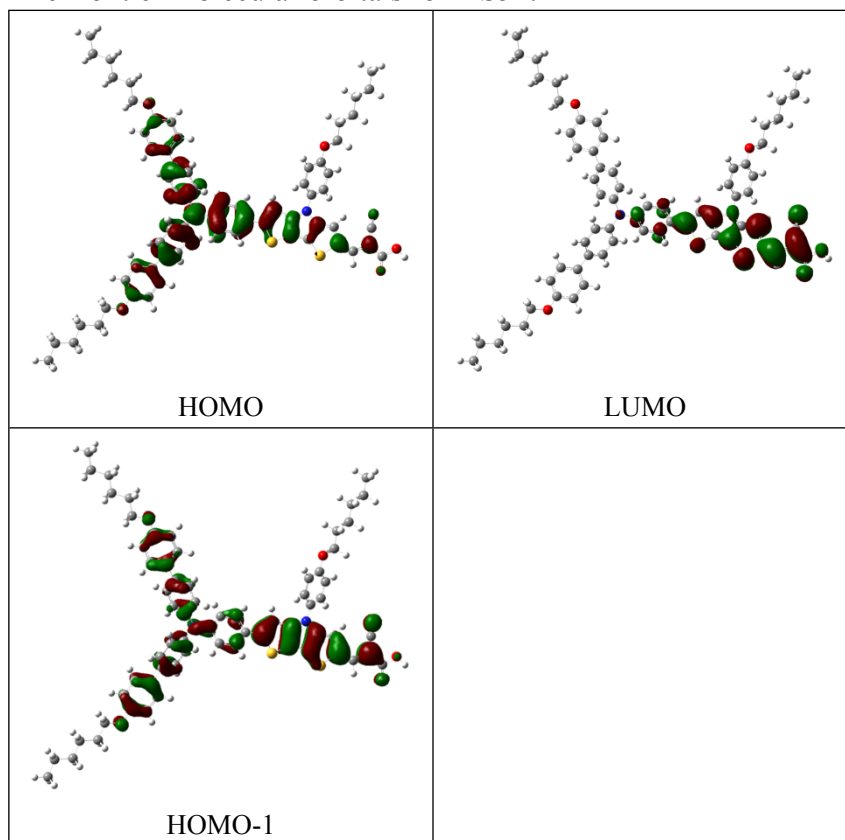

Table S2. The frontier orbitals for the designed molecules.

|    | HOMO                                                                                | LUMO                                                                                 |
|----|-------------------------------------------------------------------------------------|--------------------------------------------------------------------------------------|
| P1 | 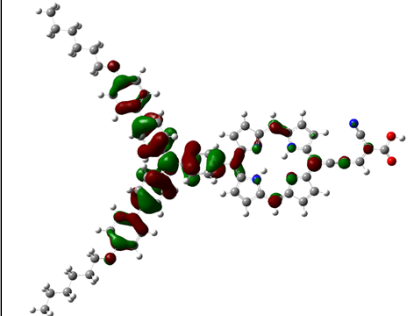   |    |
| P2 |    |    |
| P3 |   |   |
| P4 |  |  |
| P5 |  |  |

|    |                                                                                                                                                                                                                                                                                                                                                                          |                                                                                                                                                                                                                                                                                            |
|----|--------------------------------------------------------------------------------------------------------------------------------------------------------------------------------------------------------------------------------------------------------------------------------------------------------------------------------------------------------------------------|--------------------------------------------------------------------------------------------------------------------------------------------------------------------------------------------------------------------------------------------------------------------------------------------|
| P6 | 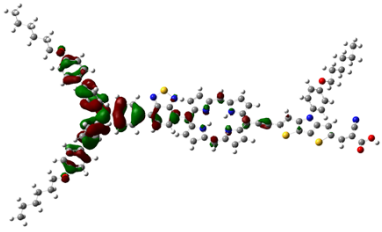 A ball-and-stick model of a protein-ligand complex. The protein backbone is shown in grey, with side chains in various colors (red, green, blue, yellow). The ligand is a large, multi-ring system with red and green atoms, positioned in the center of the protein's binding pocket. |  A ball-and-stick model of the same protein-ligand complex as in the left panel, but viewed from a different angle. The protein backbone is grey, and the ligand is the red and green multi-ring system. |
| P7 |  A ball-and-stick model of a protein-ligand complex. The protein backbone is grey, and the ligand is a red and green multi-ring system. The view is from a top-down perspective.                                                                                                        |  A ball-and-stick model of the same protein-ligand complex as in the left panel, but viewed from a different angle. The protein backbone is grey, and the ligand is the red and green multi-ring system. |

Figure S1. The spectrum of XS54 calculated with different functionals compared with the experimental data. The experimental data are taken from Chem. Commun., 49 (2013) 5748-5750.

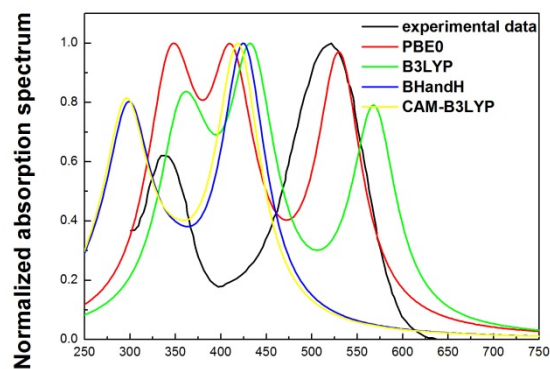

Figure S2. The energy levels of the designed sensitizers and XS54.

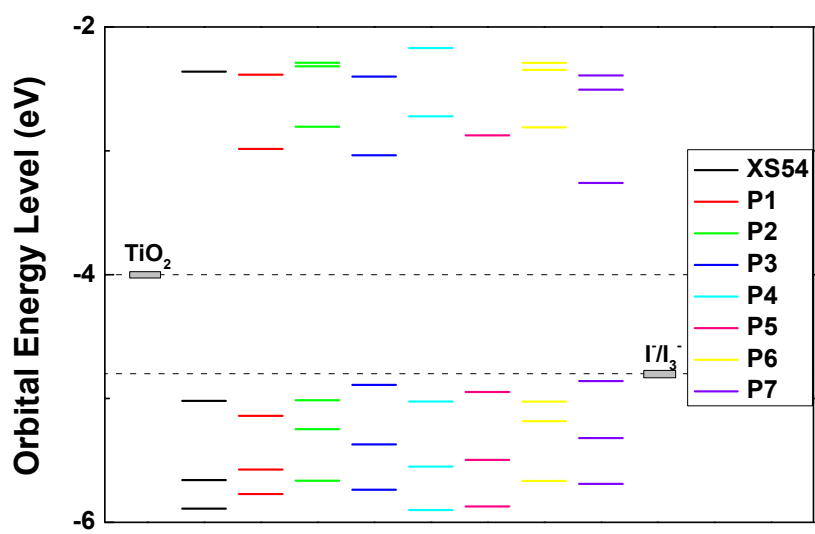

Supplement: c4ra10896e1.pdf [file c4ra10896e1.pdf]
